# Supplementary material for: Enzyme/pH-sensitive polyHPMA–DOX conjugate as a biocompatible and efficient anticancer agent
Source: Royal Society of Chemistry journal article supplement (doi:10.1039/c8bm00095f), 2018-01-01
Supplement: c8bm00095f1.pdf [file c8bm00095f1.pdf]

## Supporting Information

### Enzyme/pH-Sensitive polyHPMA-DOX Conjugate as Biocompatible and Efficient Anticancer Agent

Yuan Ou,<sup>a,b</sup> Kai Chen,<sup>b</sup> Hao Cai,<sup>b</sup> Hu Zhang,<sup>c</sup> Qiyong Gong,<sup>b</sup> Jian Wang,<sup>a</sup> Wei  
Chen,<sup>a,\*</sup> Kui Luo<sup>b</sup>

<sup>a</sup>*Department of Radiology, Southwest Hospital, Army Medical University (Third  
Military Medical University), Chongqing, 400038, China*

<sup>b</sup>*Huaxi MR Research Center (HMRRC), Department of Radiology, West China  
Hospital, Sichuan University, Chengdu 610041, China*

<sup>c</sup>*School of Chemical Engineering, The University of Adelaide, SA 5005, Australia*

\*Corresponding author.

Prof. Chen is to be contacted at Tel.:+862368754423; fax:+8665463026.

E-mail address: landcw@hotmail.com

## Method

### MW and PDI

Number-average molecular weight (M<sub>n</sub>), weight-average molecular weight (M<sub>w</sub>),  
and polydispersity (PDI) of the copolymer were tested via size-exclusion  
chromatography (SEC) on a Superose 6 HR10/30 column and on an ÄKTA/FPLC

system (GE Healthcare) equipped with three online detectors: three angle light scattering detector mini-DAWN TREOS (wavelength 658 nm), RIDetector Optilab-rEX (Wyatt Technology, Santa Barbara, CA), UV detector UPC-900 (AKTA) set for 280 nm detection), using GE Healthcare columns: Superose 6 HR10/30 (molecular weight range for hydrophilic neutral polymers 15-300 kDa/14 mL separation volume); Sodium acetate buffer/methanol (7:3, pH 6.5) was used as mobile phase with a corresponding flow rate of 0.4 mL/min. The dn/dc value (0.17 for majority of polymers under this study) was calculated using ASTRA software assuming 100% recovery of sample.

The copolymers were purified by SEC via a Superose 6 HR10/30 column, while the mobile phase was sodium acetate buffer/methanol (7: 3, pH 6.2), and the flow rate was 2.5 mL/min, and the temperature was 4 °C. The copolymers were fractionated/purified by size exclusion chromatography using Superose 6 HR10/30 (MW range for hydrophilic neutral polymers 15-300 kDa/14 mL separation volume) column on an ÄKTA FPLC system (GE Healthcare).

## Results

**Table S1.** Characterization of the prepared copolymers.

| Copolymer              | MW<br>(kDa) | PDI  | Gly% | Phe% | Leu% | DOX% |
|------------------------|-------------|------|------|------|------|------|
| diblock-pHPMA-NHBoc    | 92          | 1.10 | 0.16 | 0.18 | 0.14 | -    |
| diblock-pHPMA-NHBoc-SH | 92          | 1.10 | 0.16 | 0.18 | 0.14 | -    |
| diblock-pHPMA-DOX      | 94          | 1.12 | 0.15 | 0.17 | 0.13 | 7.1  |

The amino acids and DOX content of the product was performed by weight percent.

**Table S2.** The results of the breakdown products after incubation of the branched conjugate (3 mg/mL) in PBS (pH = 7.4) or in McIlvaine's buffer with cathepsin B (2.8 mM, pH = 5.4) at 37 °C.

| conditions                    | 0 h                 | 2h                  | 4h                  | 8h                  |
|-------------------------------|---------------------|---------------------|---------------------|---------------------|
| PBS (pH 7.4)                  | 94 kDa,<br>PDI 1.12 | 94 kDa, PDI<br>1.12 | 93 kDa,<br>PDI 1.14 | 93 kDa,<br>PDI 1.15 |
| McIlvaine's buffer (pH , 5.4) | 94 kDa,<br>PDI 1.12 | 65 kDa, PDI<br>1.64 | 54 kDa,<br>PDI 1.41 | 45 kDa,<br>PDI 1.09 |

PBS: phosphate buffered saline

**Table S3.** Pharmacokinetic parameters of free DOX and diblock-pHPAM-DOX conjugate.

|           | $t_{1/2}$ (h)    | AUC ( $\mu\text{g/mL} \times \text{h}$ ) | CL (mL/h)        | $C_{\text{max}}$ ( $\mu\text{g/mL}$ ) | MRT (h)          | $V_d$ (mL)         |
|-----------|------------------|------------------------------------------|------------------|---------------------------------------|------------------|--------------------|
| Free DOX  | 3.36 $\pm$ 0.42  | 3.90 $\pm$ 0.41                          | 25.66 $\pm$ 3.78 | 1.45 $\pm$ 0.16                       | 4.50 $\pm$ 0.39  | 115.37 $\pm$ 13.52 |
| Conjugate | 10.71 $\pm$ 0.96 | 19.73 $\pm$ 1.87                         | 5.07 $\pm$ 0.49  | 2.17 $\pm$ 0.33                       | 14.72 $\pm$ 1.66 | 74.63 $\pm$ 8.36   |

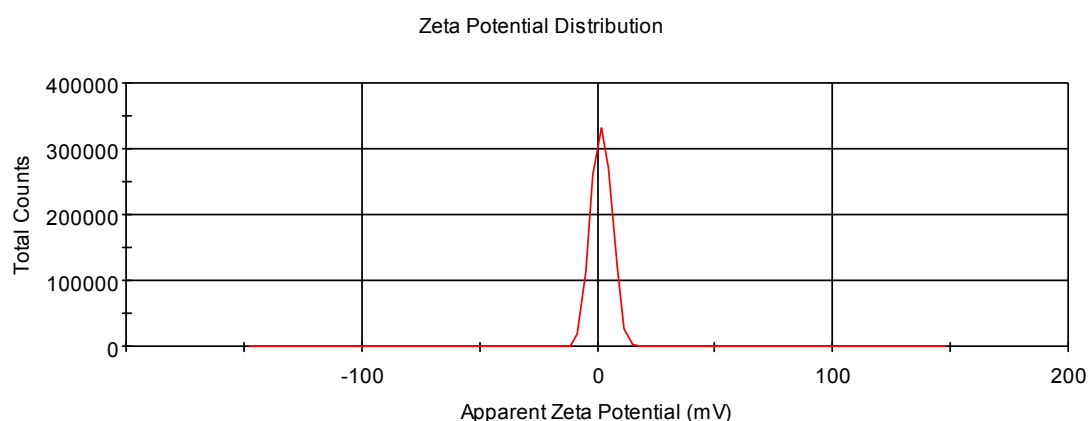

**Figure S1.** Zeta potential of diblock-pHPMA-DOX conjugate based nanoscale system (1.0 mV).

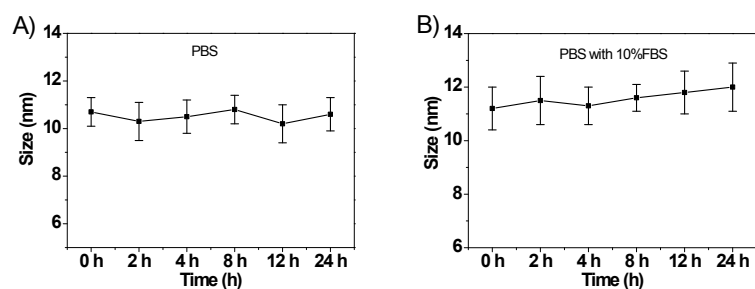

**Figure S2.** The stability of diblock-pHPMA-DOX conjugate conjugate in PBS (A) or PBS with 10% FBS (B). It is noted that the size of PBS with 10% FBS is also about 10 nm.

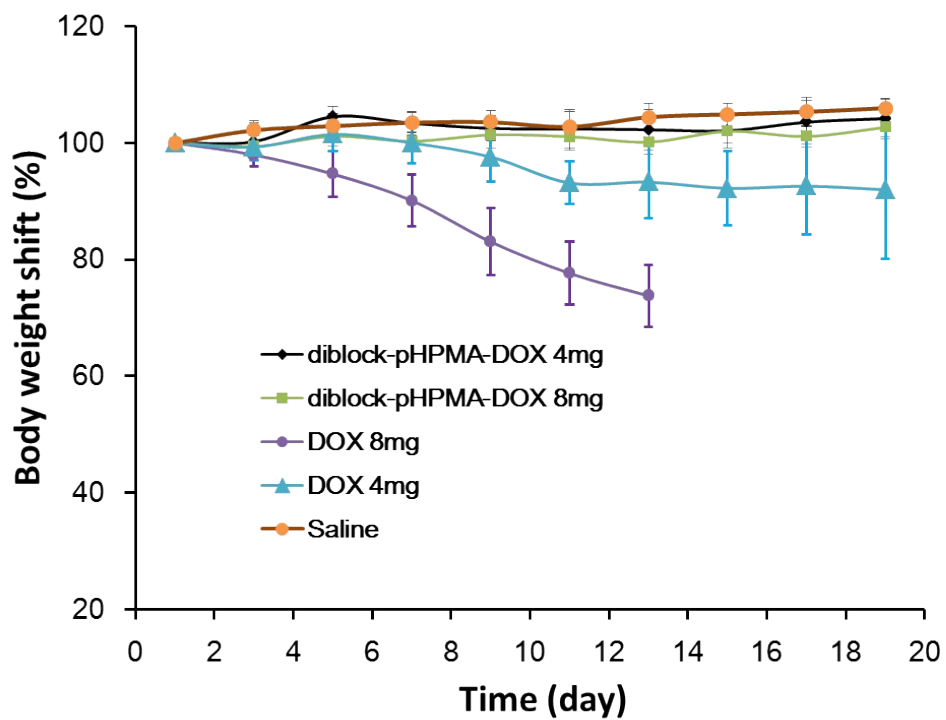

**Figure S3.** Normal animal body weight shifts. Comparison of the body weight shift of diblock-pHPMA-DOX conjugate *versus* free DOX under two different doses (4 and 8 mg/kg) and control (saline).

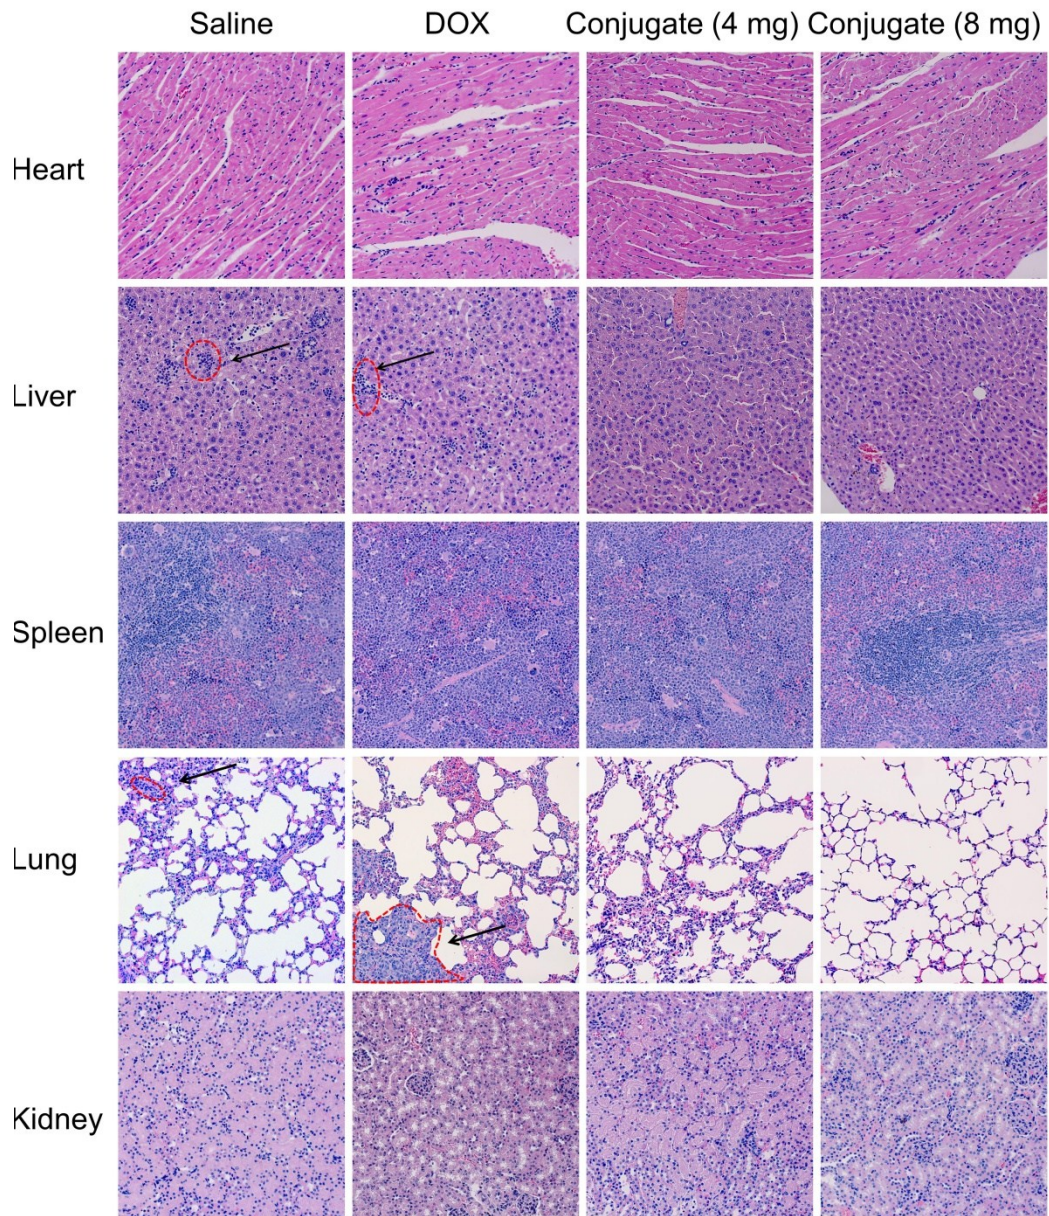

**Figure S4.** Histological analysis of organs from the mice bearing 4T1 tumors, and the mice were treated with saline, free DOX (DOX, 4 mg/kg) and diblock-pHPMA-DOX conjugate under two different doses (4 and 8 mg/kg).
